# Supplementary material for: Analysis of Default Mode Network in Social Anxiety Disorder: EEG Resting-State Effective Connectivity Study
Source: MDPI journal article supplement (doi:10.3390/s21124098), 2021-06-15
Supplement: s1 [file s1]

# Analysis of Default Mode Network in Social Anxiety Disorder: EEG Resting-State Effective Connectivity Study

Abdulhakim Al-Ezzi <sup>1</sup>, Nidal Kamel <sup>1,\*</sup>, Ibrahima Faye <sup>1</sup> and Esther Gunaseli <sup>2</sup>

<sup>1</sup> Department of Electrical and Electronic Engineering, Centre for Intelligent Signal and Imaging Research (CISIR), Universiti Teknologi PETRONAS, 32610 Seri Iskandar, Malaysia; abduhalezzy@yahoo.com (A.A.-E.); ibrahima\_faye@utp.edu.my (I.F.)

<sup>2</sup> Psychiatry Discipline Sub Unit, Universiti Kuala Lumpur, 31400 Perak, Malaysia; esther@unikl.edu.my

\* Correspondence: nidalkamel2@hotmail.com

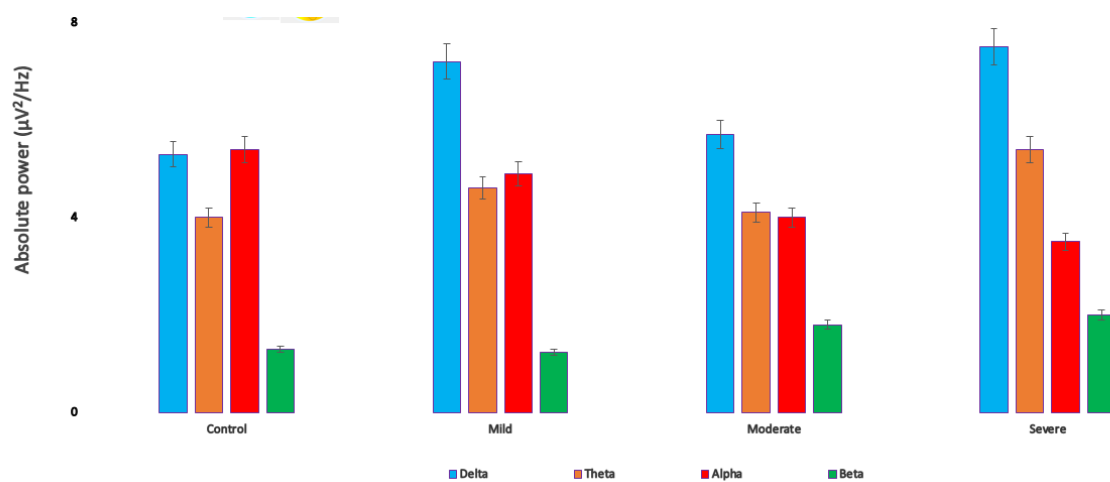

**Figure S1.** The distribution of the average absolute power for all SAD groups in different frequency bands.

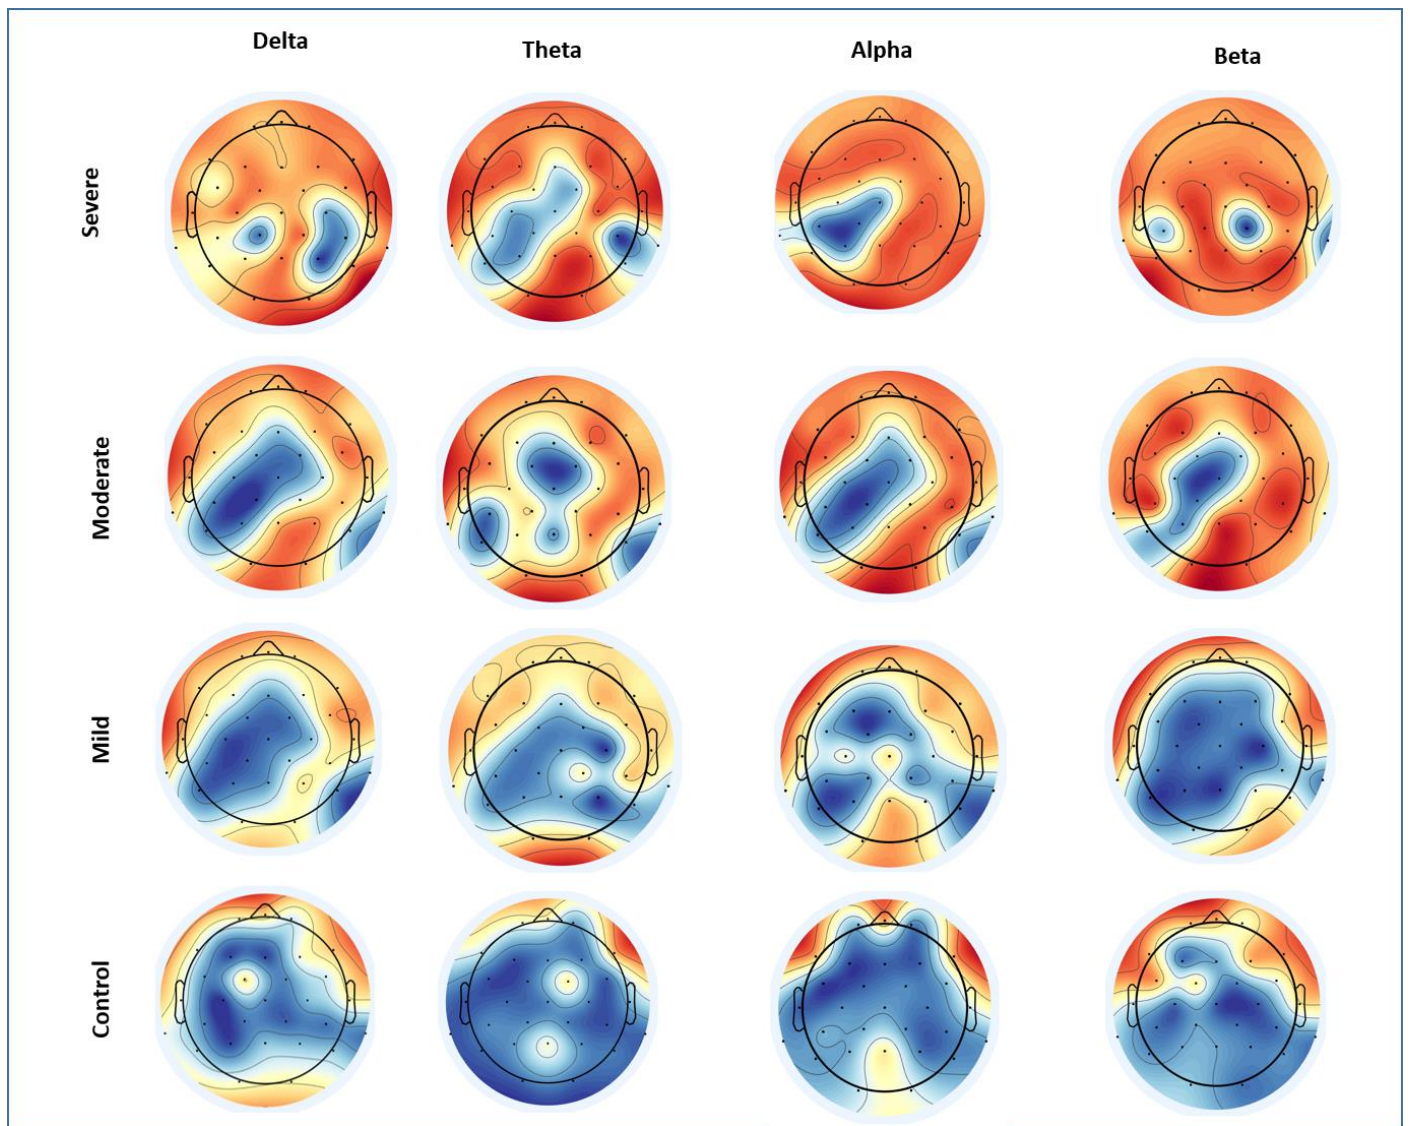

**Figure S2.** The distribution of the average absolute power for all SAD groups in different frequency bands ranging from 0 to 8.

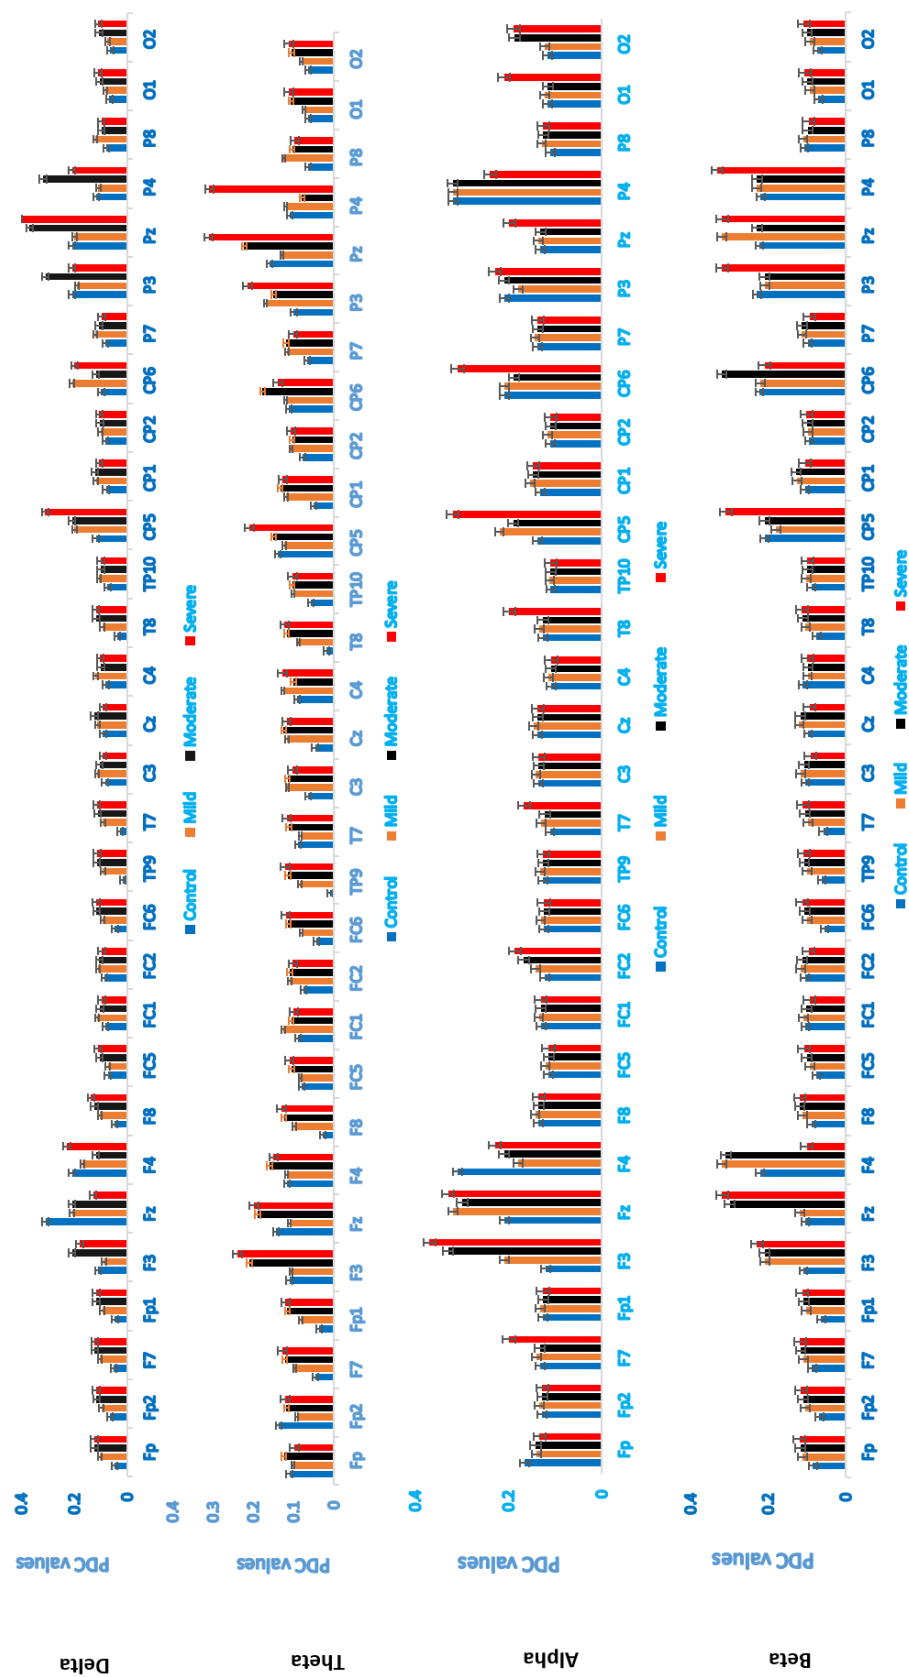

**Figure S3.** Relationship between the average PDC values and the regional DMN areas in different frequency bands.

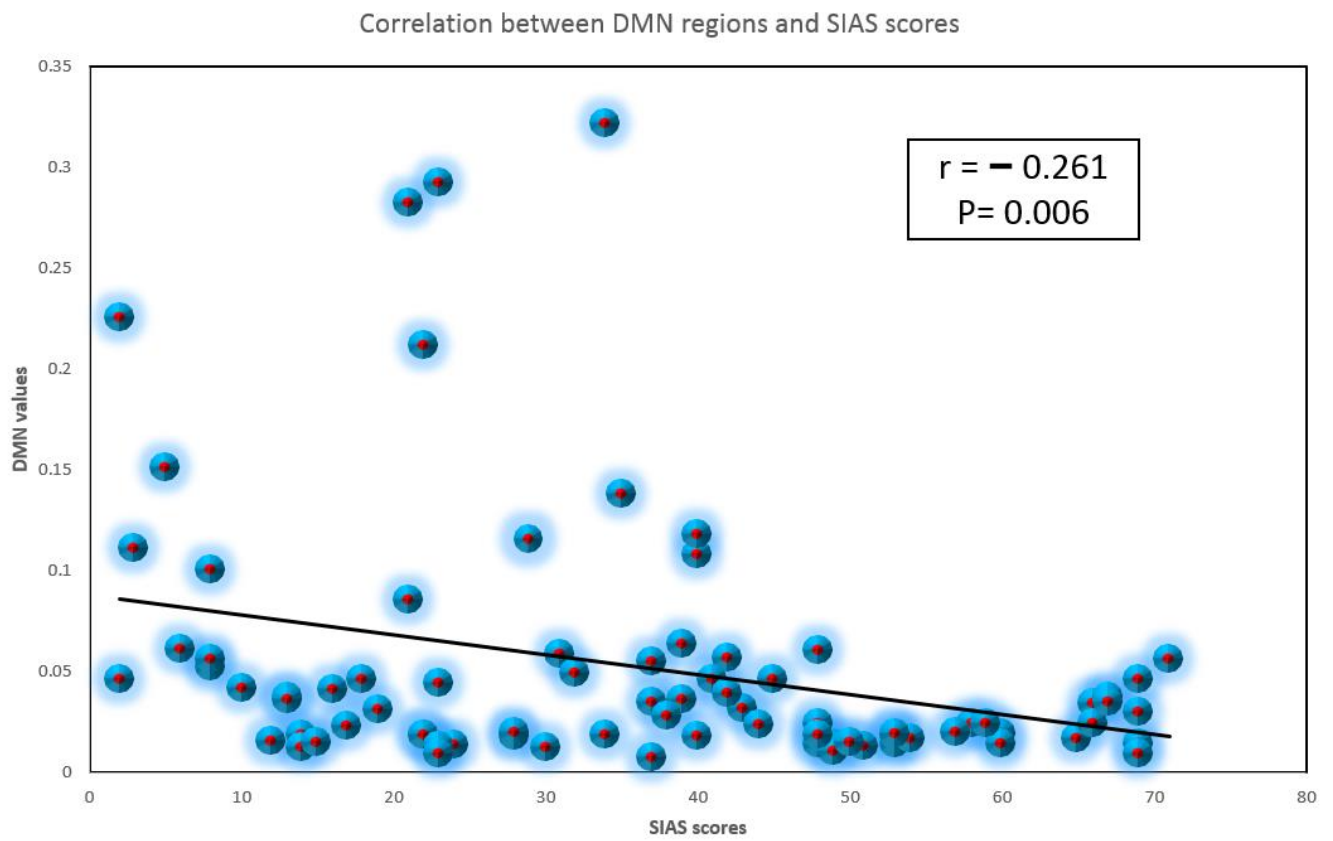

**Figure S4.** Correlation between DMN values and SIAS scores without dividing patients into different SAD conditions.
